# Supplementary material
Source: publisher site journal article supplement (https://www.dovepress.com/article/307691)
Supplement: Supplementary file 1 [file get_supplementary_file.php]

**High-specific Isolation and Instant Observation of Circulating Tumour Cell from HCC Patients via Glypican-3** **Immunomagnetic Fluorescent Nanodevice**

Qihui Chu1,†, Weiwei Mu1,†, Chuanjin Lan2, Yang Liu1, Tong Gao1, Li Guan1, Yuxiao Fang1, Zipeng Zhang1, Yingchao Liu2,*, Yongjun Liu1,*, Na Zhang1,*

1Department of Pharmaceutics, Key Laboratory of Chemical Biology (Ministry of Education), School of Pharmaceutical Sciences, Cheeloo College of Medicine, Shandong University, Jinan, 250012, China.

2Department of Neurosurgery, Shandong Provincial Hospital Affiliated with Shandong First Medical University, Jinan, 250021, China.

†These authors contributed equally to this work

Correspondence:

Yongjun Liu, E-mail: liuyongjun@sdu.edu.cn

Na Zhang, E-mail: zhangnancy9@sdu.edu.cn


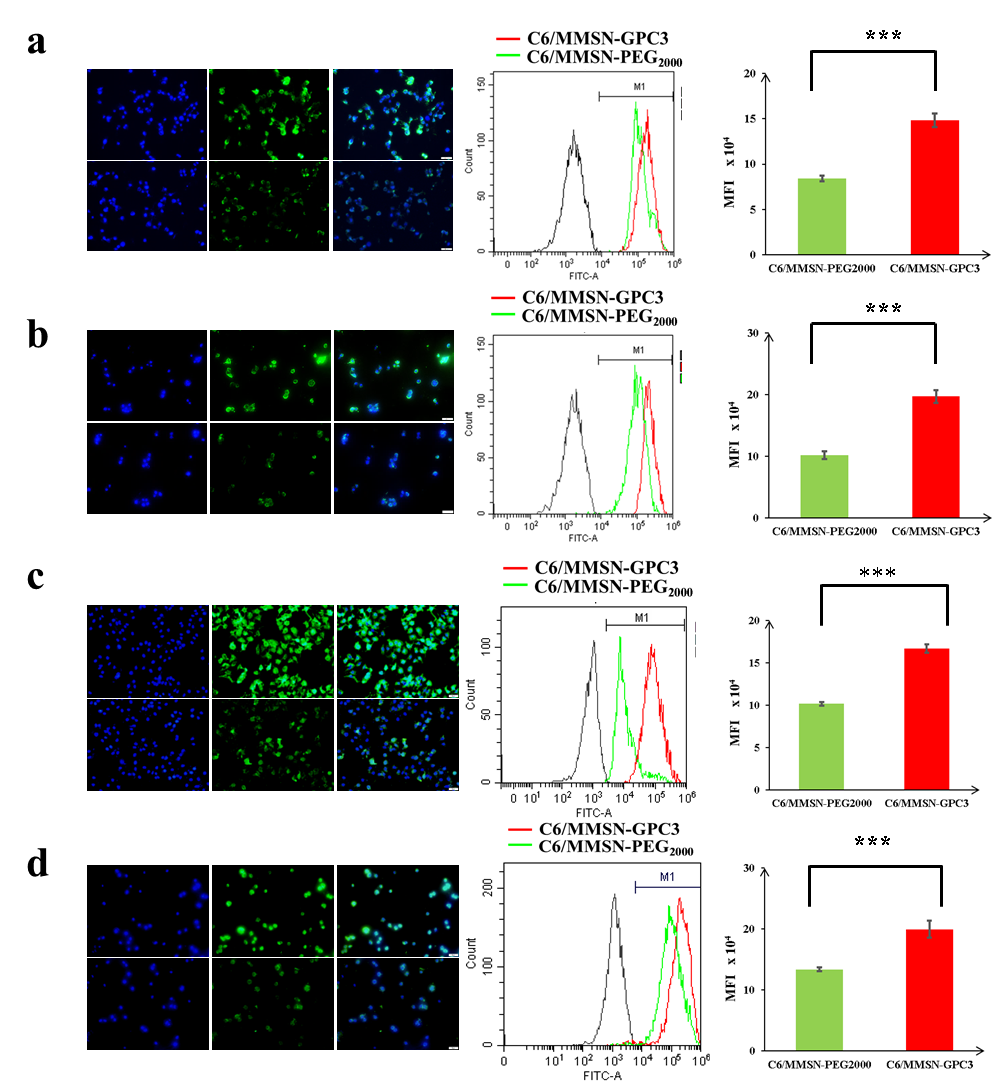


FigureS1. The GPC3-targeting nanodevice exhibited specific recognition ability on Hepa1-6 and Huh7 cells. Inverted fluorescence microscope images and flow cytometry (FCM) analysis: (a):for the adherent Hepa1-6 cells; (b): for the suspensory Hepa1-6 cells. (c): for the adherent Huh-7 cells (b): for the suspensory Huh-7 cells Data were given as mean ± SD (n = 3), ****p* < 0.001.

Table S1. Information of the HCC patients in Figure 6b.

| Sample No. | Gender | Age | Clinical stage | |
| --- | --- | --- | --- | --- |
| 1 | Male | 61 | | IV |
| 2 | Male | 47 | | III |
| 3 | Male | 64 | | IV |
| 4 | Male | 69 | | III |
| 5 | Male | 45 | | III |
| 6 | Male | 53 | | III |
| 7 | Male | 48 | | IV |

Table S2. Information of the healthy volunteers in Figure 6b.

Numbers of identified CTCs from healthy volunteers’ blood samples.

| Sample No. | Gender | Age |
| --- | --- | --- |
| 1 | Male | 32 | |
| 2 | Female | 26 | |
| 3 | Female | 27 | |

Table S3. Information of the HCC patients in Figure 6d.

| Sample No. | Gender | Age | Clinical stage | |
| --- | --- | --- | --- | --- |
| 1 | Male | 50 | | III |
| 2 | Male | 64 | | III |
| 3 | Male | 47 | | IV |
| 4 | Male | 56 | | III |
| 5 | Male | 63 | | IV |
| 6 | Female | 57 | | III |
| 7 | Female | 76 | | III |
| 8 | Male | 51 | | IV |
| 9 | Male | 47 | | III |
| 10 | Male | 49 | | IV |
| 11 | Male | 32 | | I |
| 12 | Male | 69 | | III |

Table S4 The CTC number captured with C6/MMSN-GPC3 and MACS® Beads in one case of post-surgery HCC patient

| Postoperative HCC patient | | C6/MMSN-GPC3 | MACS® Beads |
| --- | --- | --- | --- |
| ① | 5 | | 0 |
